# Supplementary material for: Effectiveness of Deep Water Running on Improving Cardiorespiratory Fitness, Physical Function and Quality of Life: A Systematic Review
Source: MDPI journal article supplement (doi:10.3390/ijerph19159434), 2022-08-01
Supplement: s1 [file s1]

**Table S1. Search Strategy**

| <b>Databases</b>                                                                    | <b>Main search terms</b>                                                                                                                                            |
|-------------------------------------------------------------------------------------|---------------------------------------------------------------------------------------------------------------------------------------------------------------------|
| SPORTDiscus,<br>MEDLINE,<br>CINAHL,<br>AMED,<br>Embase, and<br>The Cochrane Library | ‘deep water run*’ or ‘deep water jog*’ or ‘aqua jog*’ or ‘aqua run*’ or ‘running under water’ or ‘running in water’ or ‘jogging under water’ or ‘jogging in water’. |

**Table S2. Eligibility Criteria**

| <b>Inclusion Criteria</b>                                                                                                                                                                                                                                                                                            |
|----------------------------------------------------------------------------------------------------------------------------------------------------------------------------------------------------------------------------------------------------------------------------------------------------------------------|
| <i><b>Study Characteristics</b></i>                                                                                                                                                                                                                                                                                  |
| <ul style="list-style-type: none"> <li>– Adults (aged above 18)</li> <li>– Longitudinal studies (either randomised or non-randomised trials)</li> <li>– Studies must include comparison group(s)</li> <li>– Measurable outcomes in either cardiorespiratory fitness gait performance or quality of life</li> </ul>   |
| <i><b>Report Characteristics</b></i>                                                                                                                                                                                                                                                                                 |
| <ul style="list-style-type: none"> <li>– Written in English</li> <li>– In full text in peer-reviewed journals</li> </ul>                                                                                                                                                                                             |
| <b>Exclusion Criteria</b>                                                                                                                                                                                                                                                                                            |
| <i><b>Study Characteristics</b></i>                                                                                                                                                                                                                                                                                  |
| <ul style="list-style-type: none"> <li>– Non-experimental studies</li> <li>– Cross-sectional studies</li> <li>– Not DWR exercise</li> <li>– Combined exercise or treatments in intervention group</li> <li>– Measurable outcomes on biomechanics of gait, strength, balance, or anthropometric parameters</li> </ul> |
| <i><b>Report Characteristics</b></i>                                                                                                                                                                                                                                                                                 |
| <ul style="list-style-type: none"> <li>– Any reviews, unpublished articles</li> </ul>                                                                                                                                                                                                                                |

**Table S3. Selected components from Downs and Black's Checklist for measuring study quality**

| <b>Subscale</b>          | <b>Items</b>                                                                                                                                                                                                                                                                                                                                                                                                                                                                                                                                                                                                                                                                                                                                                        |
|--------------------------|---------------------------------------------------------------------------------------------------------------------------------------------------------------------------------------------------------------------------------------------------------------------------------------------------------------------------------------------------------------------------------------------------------------------------------------------------------------------------------------------------------------------------------------------------------------------------------------------------------------------------------------------------------------------------------------------------------------------------------------------------------------------|
| <i>Reporting</i>         | 1. Is the hypothesis/aim/objective of the study clearly described?<br>2. Are the main outcomes to be measured clearly described in the intro or methods section?<br>3. Are the characteristics of the patients included in the study clearly described?<br>4. Are the interventions of interest clearly described?<br>5. Are the distributions of principal confounders in each group of subjects to be compared clearly described?<br>6. Are the main findings of the study clearly described?<br>7. Does the study provide estimates of the random variability in the data for the main outcomes?<br>10. Have actual probability values been reported (e.g. 0.035 rather than <0.05) for the main outcomes except where the probability value is less than 0.001? |
| <i>External validity</i> | 11. Do the subjects asked to participate represent the population?<br>12. Do the subjects in the study represent the populations?                                                                                                                                                                                                                                                                                                                                                                                                                                                                                                                                                                                                                                   |
| <i>Internal validity</i> | 15. Was an attempt made to blind those measuring the main outcomes of the intervention?                                                                                                                                                                                                                                                                                                                                                                                                                                                                                                                                                                                                                                                                             |
| <i>-Bias</i>             | 18. Were the statistical tests used to assess the main outcomes appropriate?<br>20. Were the main outcome measures used accurate (valid and reliable)?                                                                                                                                                                                                                                                                                                                                                                                                                                                                                                                                                                                                              |
| <i>Internal validity</i> | 23. Were study subjects randomised to intervention groups?                                                                                                                                                                                                                                                                                                                                                                                                                                                                                                                                                                                                                                                                                                          |
| <i>-Confounding</i>      | 24. Was the randomised intervention assignment concealed from both patients and health care staff until recruitment was complete and irrevocable?<br>26. Were losses of patients to follow-up taken into account?                                                                                                                                                                                                                                                                                                                                                                                                                                                                                                                                                   |
| <i>Power</i>             | 27. Did the study have a power calculation?                                                                                                                                                                                                                                                                                                                                                                                                                                                                                                                                                                                                                                                                                                                         |

**Table S4. Benefits of DWR among three target populations**

| <b>Population</b>                                                     | <b>Purpose</b>                                                                       | <b>Benefits of DWR</b>                                                                                                                                                                                                                                                                                                                                                                      | <b>Evidences</b>                                                                                                                                                                                                                                                                                                                                                                                                                                                                                                                                                                                  |
|-----------------------------------------------------------------------|--------------------------------------------------------------------------------------|---------------------------------------------------------------------------------------------------------------------------------------------------------------------------------------------------------------------------------------------------------------------------------------------------------------------------------------------------------------------------------------------|---------------------------------------------------------------------------------------------------------------------------------------------------------------------------------------------------------------------------------------------------------------------------------------------------------------------------------------------------------------------------------------------------------------------------------------------------------------------------------------------------------------------------------------------------------------------------------------------------|
| <b><i>Aerobically trained athletes</i></b>                            |                                                                                      |                                                                                                                                                                                                                                                                                                                                                                                             |                                                                                                                                                                                                                                                                                                                                                                                                                                                                                                                                                                                                   |
| - Injured runners                                                     | Rehabilitation                                                                       | <ul style="list-style-type: none"> <li>- Reduces deconditioning</li> <li>- Accelerates rehabilitation while maintaining high aerobic conditioning</li> <li>- Maintains aerobic capacity while reducing mechanical load on lower limbs</li> </ul>                                                                                                                                            | <p><b><i>Findings from included studies</i></b></p> <ul style="list-style-type: none"> <li>- Runners maintained similar VO<sub>2</sub>max and 2-mile run time with a 6-week DWR training for rehabilitation[1].</li> </ul> <p><b><i>Findings from previous publications</i></b></p> <ul style="list-style-type: none"> <li>- Simulates running in water without incurring possible harmful effects due to weightbearing[2].</li> <li>- Reduces mechanical load on lower limbs[2].</li> </ul>                                                                                                      |
| - Uninjured athletes                                                  | Supplementary training<br>Alternative training<br>Strength and conditioning training | <ul style="list-style-type: none"> <li>- Minimizes likelihood of getting injured</li> <li>- As light recovering workout following high intensity trainings</li> <li>- As recovery from delayed-onset muscle soreness brought by land-based training</li> <li>- Prevents detraining</li> </ul> <p><b>Application:</b></p> <ul style="list-style-type: none"> <li>- Cross training</li> </ul> | <p><b><i>Findings from included studies</i></b></p> <ul style="list-style-type: none"> <li>- Non-injured athletes showed no significant difference in VO<sub>2</sub>max following 6-week DWR in comparison with treadmill running and land-based running[2].</li> <li>- DWR workout served as an effective alternative training[1-3].</li> </ul> <p><b><i>Findings from previous publications</i></b></p> <ul style="list-style-type: none"> <li>- DWR serves as light recovering workout following high intensity trainings[1-3].</li> <li>- DWR as cross training for runners[3, 4].</li> </ul> |
| <b><i>Individuals with health conditions</i></b>                      |                                                                                      |                                                                                                                                                                                                                                                                                                                                                                                             |                                                                                                                                                                                                                                                                                                                                                                                                                                                                                                                                                                                                   |
| - Obesity                                                             | Aerobic training                                                                     | <ul style="list-style-type: none"> <li>- Improves body composition, blood pressure, and fitness status</li> <li>- Weight reduction</li> </ul>                                                                                                                                                                                                                                               | <p><b><i>Findings from included studies</i></b></p> <ul style="list-style-type: none"> <li>- Increases energy expenditure for weight reduction[5].</li> <li>- Reduces mechanical loads on joints[5].</li> </ul> <p><b><i>Findings from previous publications</i></b></p> <ul style="list-style-type: none"> <li>- ACSM suggested aquatic aerobic exercise like DWR as favourable choice of aerobic training [5, 6].</li> <li>- Enhances physical function with lower injury risk[5, 6].</li> <li>- Increases adherence to exercise training for inactive individuals[5, 6].</li> </ul>            |
| Other health conditions:<br>- Chronic low back pain<br>- Fibromyalgia | Non-pharmacologic pain management                                                    | <ul style="list-style-type: none"> <li>- Activates different trunk muscles</li> <li>- Stabilization in lumbopelvic complex</li> <li>- Reduces pain</li> <li>- Reduces kinesiophobia</li> </ul>                                                                                                                                                                                              | <p><b><i>Findings from included studies</i></b></p> <ul style="list-style-type: none"> <li>- DWR significantly reduce VAS in subjects with fibromyalgia and low back pain with moderate to high effect size[7-9].</li> <li>- Properties in warm aquatic environment promotes relaxation, vasodilation and analgesic effects for fibromyalgia patients[9].</li> </ul>                                                                                                                                                                                                                              |

| Population                             | Purpose                               | Benefits of DWR                                                                                                                                                                                                                                                                                                  | Evidences                                                                                                                                                                                                                                                                                                                                                                                                                                                                                                                                                                                                                                                                                                                                       |
|----------------------------------------|---------------------------------------|------------------------------------------------------------------------------------------------------------------------------------------------------------------------------------------------------------------------------------------------------------------------------------------------------------------|-------------------------------------------------------------------------------------------------------------------------------------------------------------------------------------------------------------------------------------------------------------------------------------------------------------------------------------------------------------------------------------------------------------------------------------------------------------------------------------------------------------------------------------------------------------------------------------------------------------------------------------------------------------------------------------------------------------------------------------------------|
|                                        | Safe therapeutic exercise             | <ul style="list-style-type: none"> <li>- Affects quality of life</li> <li>- Provides safer environment</li> <li>- Gains in cardiorespiratory fitness</li> </ul> <p><b>Application:</b></p> <ul style="list-style-type: none"> <li>- Suitable for improving dynamic trunk stability and pain reduction</li> </ul> | <p><b>Findings from previous publications</b></p> <ul style="list-style-type: none"> <li>- Buoyancy lessens axial load on spine, while unstable aquatic environment acts as a challenging component to maintain trunk stability[10].</li> <li>- Feet non-contacting floor during DWR fosters coordination and stabilization in lumbopelvic complex[8].</li> <li>- Exercise helps to release cortisol and adrenaline into bloodstream and therefore increase pain threshold[8].</li> <li>- Hydrostatic pressure exerted on skin triggers mechanoreceptors that helps blocking nociceptors[10].</li> <li>- Immersion in warm water speeds up body metabolism, for faster removal of metabolic waste and activates the nociceptors[11].</li> </ul> |
| <b>Untrained population</b>            |                                       |                                                                                                                                                                                                                                                                                                                  |                                                                                                                                                                                                                                                                                                                                                                                                                                                                                                                                                                                                                                                                                                                                                 |
| - Community dwelling elderly           | Aerobic training<br>Strength training | <ul style="list-style-type: none"> <li>- Increases cardiac output and stroke volume by aquatic immersion</li> <li>- Allows interval aerobic exercise at high loads with low risk of injury</li> </ul>                                                                                                            | <p><b>Findings from included studies</b></p> <ul style="list-style-type: none"> <li>- Elderly subjects showed increased power in lower extremity and better physical function[12].</li> <li>- improvements in submaximal and maximal aerobic power among elderly women after 8-week high intensity interval DWR with vest[13].</li> </ul> <p><b>Findings from previous publications</b></p> <ul style="list-style-type: none"> <li>- Gains in aerobic fitness for elderly[14].</li> <li>- Aquatic immersion facilitates central shift of blood volume due to hydrostatic pressure[15].</li> <li>- Flotation vest keeps the body in upright position and avoid contact with the floor[16].</li> </ul>                                            |
| - Sedentary population                 | healthy<br>Aerobic training           | <ul style="list-style-type: none"> <li>- Gains in cardiorespiratory fitness</li> </ul> <p><b>Application:</b></p> <ul style="list-style-type: none"> <li>- Suitable for low impact and less thermally stressful training</li> </ul>                                                                              | <p><b>Findings from included studies</b></p> <ul style="list-style-type: none"> <li>- Improvement in VO2max in DWR almost twice as much as treadmill running[3].</li> <li>- DWR as non-weightbearing activity adopted different muscle recruitment pattern [3].</li> <li>- exhausting less work on large muscle groups in lower extremity[3].</li> <li>- more work for upper extremity during arm and shower movements[3].</li> </ul>                                                                                                                                                                                                                                                                                                           |
| ACSM: American College Sports Medicine |                                       |                                                                                                                                                                                                                                                                                                                  |                                                                                                                                                                                                                                                                                                                                                                                                                                                                                                                                                                                                                                                                                                                                                 |

## References

1. Eyestone, E.D., et al., *Effect of water running and cycling on maximum oxygen consumption and 2-mile run performance*. The American journal of sports medicine, 1993. **21**(1): p. 41-44.
2. Wilber, R.L., et al., *Influence of water run training on the maintenance of aerobic performance*. Medicine and Science in Sports and Exercise, 1996. **28**(8): p. 1056-1062.
3. Michaud, T.J., et al., *Aquarunning and gains in cardiorespiratory fitness*. The Journal of Strength & Conditioning Research, 1995. **9**(2): p. 78-84.
4. Davidson, K. and L. McNaughton, *Deep water running training and road running training improve VO2max in untrained women*. Journal of Strength & Conditioning Research, 2000. **14**(2): p. 191-195.
5. Colato, A., et al., *Impact of aerobic water running training on peripheral immune-endocrine markers of overweight-obese women*. Science and Sports, 2017. **32**(1): p. 46-53.
6. American College of Sports Medicine, *ACSM's guidelines for exercise testing and prescription*. 9th ed. Exercise prescription for healthy populations with special considerations and environmental considerations. 2014, Philadelphia: Lippincott Williams & Wilkins.
7. Kanitz, A.C., et al., *Aquatic and land aerobic training for patients with chronic low back pain: a randomized study*. Human Movement, 2019. **20**(1): p. 1-8.
8. Cuesta-Vargas, A., et al., *Deep water running and general practice in primary care for non-specific low back pain versus general practice alone: randomized controlled trial*. Clinical Rheumatology, 2012. **31**(7): p. 1073-1078.
9. Assis, M.R., et al., *A randomized controlled trial of deep water running: clinical effectiveness of aquatic exercise to treat fibromyalgia*. Arthritis Care & Research, 2006. **55**(1): p. 57-65.
10. Kanitz, A.C., et al., *Effects of two deep water training programs on cardiorespiratory and muscular strength responses in older adults*. Exp Gerontol, 2015. **64**: p. 55-61.
11. Hall, J., et al., *Does Aquatic Exercise Relieve Pain in Adults With Neurologic or Musculoskeletal Disease? A Systematic Review and Meta-Analysis of Randomized Controlled Trials*. Archives of Physical Medicine and Rehabilitation, 2008. **89**(5): p. 873-883.
12. Alberti, D., L. Lazarotto, and P.C.B. Bento, *Effects of a deep-water running program on muscle function and functionality in elderly women community dwelling*. Motriz: Revista de Educação Física, 2017. **23**(4): p. 1-8.
13. Broman, G., et al., *High intensity deep water training can improve aerobic power in elderly women*. European Journal of Applied Physiology, 2006. **98**(2): p. 117-123.
14. Jorgic, B., et al., *Effects of deep water running in older adults. a systematic review*. HealthMED, 2012. **6**(9): p. 3219-3227.
15. Reilly, T., C.N. Dowzer, and N.T. Cable, *The physiology of deep-water running*. Journal Of Sports Sciences, 2003. **21**(12): p. 959-972.
16. Kanitz, A.C., et al., *Effects of two deep water training programs on cardiorespiratory and muscular strength responses in older adults*. Experimental Gerontology, 2015. **64**: p. 55-61.
